# Supplementary material for: Overexpression of AmRosea1 Gene Confers Drought and Salt Tolerance in Rice
Source: MDPI journal article supplement (doi:10.3390/ijms18010002), 2016-12-22
Supplement: s1 [file s1]

# Supplementary Materials: Overexpression of *AmRosea1* Gene Confers Drought and Salt Tolerance in Rice

Mingzhu Dou, Sanhong Fan, Suxin Yang, Rongfeng Huang, Huiyun Yu and Xianzhong Feng

Table S1. Summary of mapping results.

| Map to Gene          | WT-PEG-0 h   |            | WT-PEG-6 h   |            | WT-PEG-24 h  |            | WT-Salt-0 h  |            | WT-Salt-1 h  |            | WT-Salt-6 h  |            |
|----------------------|--------------|------------|--------------|------------|--------------|------------|--------------|------------|--------------|------------|--------------|------------|
|                      | Reads Number | Percentage |
| clean reads          | 7,333,513    | 100%       | 7,116,841    | 100%       | 7,389,213    | 100%       | 7,387,204    | 100%       | 7,239,102    | 100%       | 7,390,469    | 100%       |
| Total mapped reads   | 6,596,369    | 89.95%     | 6,432,701    | 90.39%     | 6,265,857    | 84.80%     | 66,69,882    | 90.29%     | 6,607,019    | 91.27%     | 6,768,117    | 91.58%     |
| Total unmapped reads | 737,144      | 10.05%     | 684,140      | 9.61%      | 1,123,356    | 15.20%     | 717,322      | 9.71%      | 632,083      | 8.73%      | 622,352      | 8.42%      |
| Unique_match         | 3,293,165    | 44.91%     | 3,283,291    | 46.13%     | 3,168,963    | 42.89%     | 3,314,077    | 44.86%     | 3,409,482    | 47.10%     | 3,656,368    | 49.47%     |
| Multi-position match | 3,303,204    | 45.04%     | 3,149,410    | 44.25%     | 3,096,894    | 41.91%     | 3,355,805    | 45.43%     | 3,197,537    | 44.17%     | 3,111,749    | 42.10%     |
| Perfect match        | 6,040,500    | 82.37%     | 5,874,905    | 82.55%     | 5,711,530    | 77.30%     | 6,129,419    | 82.97%     | 6,048,954    | 83.56%     | 6,180,542    | 83.63%     |
| ≤5 bp mismatch       | 525,415      | 7.16%      | 530,256      | 7.45%      | 522,317      | 7.07%      | 505,249      | 6.84%      | 526,733      | 7.28%      | 548,742      | 7.42%      |
| Map to Gene          | OXR-PEG-0h   |            | OXR-PEG-6h   |            | OXR-PEG-24h  |            | OXR-Salt-0h  |            | OXR-Salt-1 h |            | OXR-Salt-6 h |            |
|                      | Reads Number | Percentage |
| clean reads          | 7,245,902    | 100%       | 7,321,939    | 100%       | 7,401,080    | 100%       | 7,221,670    | 100%       | 7,336,233    | 100%       | 7,344,809    | 100%       |
| Total mapped reads   | 6,449,341    | 89.01%     | 6,556,674    | 89.55%     | 6,598,040    | 89.15%     | 6,501,240    | 90.02%     | 6,173,666    | 84.15%     | 6,639,746    | 90.40%     |
| Total unmapped reads | 796,561      | 10.99%     | 765,265      | 10.45%     | 803,040      | 10.85%     | 720,430      | 9.98%      | 1,162,567    | 15.85%     | 705,063      | 9.60%      |
| Unique_match         | 3,239,357    | 44.71%     | 3,309,357    | 45.20%     | 3,343,701    | 45.18%     | 3,246,232    | 44.95%     | 3,208,032    | 43.73%     | 3,554,091    | 48.39%     |
| Multi-position match | 3,209,984    | 44.30%     | 3,247,317    | 44.35%     | 3,254,339    | 43.97%     | 3,255,008    | 45.07%     | 2,965,634    | 40.42%     | 3,085,655    | 42.01%     |
| Perfect match        | 5,885,693    | 81.23%     | 6,009,162    | 82.07%     | 6,075,612    | 82.09%     | 5,954,529    | 82.45%     | 5,635,346    | 76.82%     | 6,034,068    | 82.15%     |
| ≤5 bp mismatch       | 529,401      | 7.31%      | 512,213      | 7.00%      | 484,554      | 6.55%      | 514,871      | 7.13%      | 502,769      | 6.85%      | 559,694      | 7.62%      |

**Table S5.** List of DEGs involved in plant hormone pathways under drought stress.

| Hormone        | EC      | Gene ID         | log <sub>2</sub> (RPKM <sub>OXR</sub> /RPKM <sub>WT</sub> ) |           |          |
|----------------|---------|-----------------|-------------------------------------------------------------|-----------|----------|
|                |         |                 | 0 h                                                         | 6 h       | 24 h     |
| Cytokinin      | A-ARR   | Os04t0673300-01 | 1.238085                                                    | 3.065659  | 0.979313 |
| Absciscic acid | PYR/PYL | Os03t0297600-01 | 0.563933                                                    | 1.987756  | -0.19252 |
|                |         | Os05t0473000-01 | 1.387322                                                    | 4.935228  | 0.705962 |
|                | PP2C    | Os01t0583100-01 | -0.170357                                                   | -1.130925 | 0.161511 |
|                | ABF     | Os02t0766700-01 | -0.064178                                                   | -1.153477 | 0.430554 |
| Ethylene       | EBF1/2  | Os06t0605900-01 | 1.120422                                                    | 2.458976  | 0.638164 |
| Jasmonic acid  | COI1    | Os05t0449500-01 | 0.676641                                                    | 1.037637  | 0.484258 |
| Salicylic acid | PR-1    | Os07t0129300-00 | 2.452397                                                    | 0.953668  | 1.374756 |

**Table S6.** List of DEGs involved in plant hormone pathways under salt stress.

| Hormone        | EC     | Gene_ID         | $\log_2$ (RPKM <sub>OXR</sub> /RPKM <sub>WT</sub> ) |           |           |
|----------------|--------|-----------------|-----------------------------------------------------|-----------|-----------|
|                |        |                 | 0 h                                                 | 1 h       | 6 h       |
| Cytokinin      | A-ARR  | Os04t0673300-01 | 0.764954                                            | -1.070037 | -0.241291 |
|                |        | Os11t0143300-01 | -2.214695                                           | -1.208195 | 2.157301  |
|                |        | Os12t0139400-01 | -2.050575                                           | -1.877847 | 0.362545  |
| Absciscic acid | SnRK2  | Os07t0622000-01 | -0.437177                                           | -1.439286 | 0.192399  |
| Ethylene       | CTR1   | Os02t0527600-01 | 0.353983                                            | 1.167067  | 0.133855  |
|                | EBF1/2 | Os06t0605900-01 | 1.068686                                            | 0.48677   | 0.007147  |
| Jasmonic acid  | JAZ    | Os03t0402800-01 | -0.878805                                           | -1.461285 | -0.143723 |
|                |        | Os07t0615200-01 | -0.687653                                           | -1.525973 | -0.237743 |
| Salicylic acid | PR-1   | Os07t0129300-00 | -1.130328                                           | -0.249022 | -1.460031 |

**Table S7.** List of DEGs related stress tolerance in OXR plants compared with WT under drought condition.

| Gene ID                           | log <sub>2</sub> (RPKM <sub>OXR</sub> /RPKM <sub>WT</sub> ) |       |       | Description                                           |
|-----------------------------------|-------------------------------------------------------------|-------|-------|-------------------------------------------------------|
|                                   | 0 h                                                         | 6 h   | 24 h  |                                                       |
| HSP (heat shock protein)          |                                                             |       |       |                                                       |
| Os01t0135900-02                   | −0.26                                                       | 1.15  | 0.36  | LMW heat shock protein.                               |
| Os01t0184100-01                   | 1.08                                                        | 2.14  | −0.46 | Similar to 17.5 kDa class II heat shock protein.      |
| Os06t0650900-02                   | 0.99                                                        | −1.25 | 0.17  | Heat shock protein DnaJ family protein.               |
| Os06t0716700-01                   | −2.92                                                       | 2.69  | 0.68  | Similar to Heat shock protein 90.                     |
| Os07t0517100-03                   | 0.20                                                        | 1.49  | −0.27 | Similar to 18.8 kDa class V heat shock protein.       |
| Os11t0216100-01                   | −0.09                                                       | −1.00 | −0.89 | Similar to Heat shock protein binding protein.        |
| LEA (late embryogenesis abundant) |                                                             |       |       |                                                       |
| Os01t0314800-01                   | −0.61                                                       | −1.21 | 0.62  | Late embryogenesis abundant protein 3 family protein. |
| Os05t0542500-02                   | 0.21                                                        | 3.36  | 2.41  | LEA-like protein.                                     |
| Chaperone protein                 |                                                             |       |       |                                                       |
| Os08t0452900-01                   | 0.09                                                        | 1.26  | 0.12  | Similar to Chaperone protein dnaJ.                    |
| Os12t0277500-01                   | −0.65                                                       | 0.39  | 1.00  | 60 kDa chaperonin alpha subunit.                      |
| Metallothionein                   |                                                             |       |       |                                                       |
| Os01t0974200-01                   | −0.49                                                       | −1.19 | −1.13 | RicMT (Metallothionein-like protein).                 |
| Os05t0202800-00                   | 0.39                                                        | −4.34 | NA    | Similar to Metallothionein-like protein 3B.           |

**Table S8.** List of DEGs related stress tolerance in OXR plants compared with WT under salt condition.

| Gene ID                                 | log <sub>2</sub> (RPKM <sub>OXR</sub> /RPKM <sub>WT</sub> ) |       |       | Description                                                    |
|-----------------------------------------|-------------------------------------------------------------|-------|-------|----------------------------------------------------------------|
|                                         | 0 h                                                         | 1 h   | 6 h   |                                                                |
| HSP (heat shock protein)                |                                                             |       |       |                                                                |
| Os01t0135900-02                         | -0.36                                                       | 0.32  | 1.14  | LMW heat shock protein.                                        |
| Os03t0266300-01                         | -0.48                                                       | 1.08  | -0.43 | Class I low-molecular-weight heat shock protein 17.9.          |
| Os03t0266900-02                         | -0.63                                                       | 1.24  | -0.13 | Low molecular mass heat shock protein Oshsp17.3.               |
| Os05t0579900-02                         | 0.03                                                        | -1.36 | 0.42  | Heat shock protein DnaJ.                                       |
| Os06t0253100-01                         | -0.86                                                       | 2.57  | -0.65 | Heat shock protein Hsp20 domain containing protein.            |
| Os06t0716700-01                         | -0.57                                                       | 3.6   | 2.08  | Similar to Heat shock protein 90.                              |
| Os08t0500700-01                         | -0.71                                                       | 1.03  | -0.12 | Similar to Heat shock protein 82.                              |
| LEA (late embryogenesis abundant)       |                                                             |       |       |                                                                |
| Os01t0314800-01                         | -0.99                                                       | -1.44 | -0.42 | Late embryogenesis abundant protein 3 family protein.          |
| Os01t0705200-01                         | NA                                                          | -2.09 | -0.37 | Late embryogenesis abundant protein repeat containing protein. |
| Os03t0322900-00                         | -1.6                                                        | -2.14 | -0.32 | Late embryogenesis abundant protein repeat containing protein. |
| Os08t0327700-01                         | NA                                                          | -2.09 | -0.8  | Late embryogenesis abundant (LEA) group 1 family protein.      |
| Os05t0542500-02                         | 2.02                                                        | -0.65 | -0.23 | LEA-like protein.                                              |
| Chaperone protein                       |                                                             |       |       |                                                                |
| Os08t0405700-01                         | 0.66                                                        | -1.12 | -0.43 | Similar to Copper chaperone homolog CCH.                       |
| Metallothionein                         |                                                             |       |       |                                                                |
| Os12t0570700-01                         | 0.49                                                        | 1.46  | 0.29  | Similar to Metallothionein-like protein type 1.                |
| PIP (plasma membrane intrinsic protein) |                                                             |       |       |                                                                |
| Os02t0629200-02                         | -0.46                                                       | -1.12 | -0.49 | Similar to HvPIP2;1 protein.                                   |

**Table S9.** Expressions of anthocyanin relating genes in OXR and WT plants under drought stress

| Gene ID         | OXR (RPKM) |         |         | WT (RPKM) |         |         |
|-----------------|------------|---------|---------|-----------|---------|---------|
|                 | 0 h        | 6 h     | 24 h    | 0 h       | 6 h     | 24 h    |
| F3H             |            |         |         |           |         |         |
| OS02T0767300-01 | 1.406      | 0.667   | 1.527   | 2.659     | 0.602   | 0.771   |
| Os03t0122300-01 | 142.858    | 188.527 | 245.626 | 210.445   | 156.028 | 297.271 |
| Os04t0581000-01 | 4.058      | 3.429   | 8.436   | 1.735     | 0.648   | 3.459   |
| F3'H            |            |         |         |           |         |         |
| Os10t0317900-01 | 37.962     | 14.645  | 17.149  | 48.349    | 19.766  | 26.152  |
| Os10t0320100-01 | 8.212      | 0.755   | 1.481   | 25.071    | 0.553   | 1.937   |
| FLS             |            |         |         |           |         |         |
| OS02T0767300-01 | 1.406      | 0.667   | 1.527   | 2.659     | 0.602   | 0.771   |
| DFR             |            |         |         |           |         |         |
| OS01T0633500-00 | 0          | 0       | 0       | 0         | 0       | 0       |
| Os03t0184550-01 | 15.324     | 19.105  | 21.783  | 3.696     | 8.042   | 19.385  |
| OS03T0184600-01 | 13.05      | 10.801  | 14.496  | 10.672    | 11.117  | 13.673  |
| OS08T0183900-01 | 13.821     | 11.787  | 3.293   | 23.287    | 27.634  | 9.186   |
| Os08t0515900-01 | 0.701      | 1.16    | 0.701   | 0.636     | 0.461   | 0.614   |
| Os09t0491868-00 | 0          | 0       | 0       | 0         | 0       | 0       |
| UFGT            |            |         |         |           |         |         |
| Os06t0192100-00 | 0.377      | 0.312   | 0.063   | 0.559     | 0.619   | 0.264   |
| Os07t0148200-01 | 6.002      | 5.865   | 3.533   | 8.74      | 6.007   | 4.794   |

**Table S10.** Expressions of anthocyanin relating genes in OXR and WT plants under salt stress.

| Gene ID         | OXR (RPKM) |         |        | WT (RPKM) |        |         |
|-----------------|------------|---------|--------|-----------|--------|---------|
|                 | 0 h        | 1 h     | 6 h    | 0 h       | 1 h    | 6 h     |
| <b>F3H</b>      |            |         |        |           |        |         |
| OS02T0767300-01 | 1.624      | 0.129   | 0      | 0.962     | 0.362  | 0       |
| Os03t0122300-01 | 122.342    | 172.764 | 91.472 | 174.902   | 354.6  | 113.196 |
| Os04t0581000-01 | 3.723      | 3.016   | 0.648  | 3.99      | 6.655  | 0.427   |
| <b>F3'H</b>     |            |         |        |           |        |         |
| Os10t0317900-01 | 19.664     | 7.843   | 2.046  | 37.843    | 7.572  | 0.649   |
| Os10t0320100-01 | 1.971      | 0.847   | 1.421  | 5.476     | 0.791  | 1.988   |
| <b>FLS</b>      |            |         |        |           |        |         |
| OS02T0767300-01 | 1.624      | 0.129   | 0      | 0.962     | 0.362  | 0       |
| <b>DFR</b>      |            |         |        |           |        |         |
| OS01T0633500-00 | 0          | 0       | 0      | 0         | 0      | 0       |
| Os03t0184550-01 | 48.98      | 82.765  | 48.436 | 27.077    | 18.01  | 44.685  |
| OS03T0184600-01 | 15.193     | 15.91   | 11.596 | 13.312    | 12.659 | 14.467  |
| OS08T0183900-01 | 8.599      | 10.503  | 18.592 | 14.881    | 10.973 | 22.537  |
| Os08t0515900-01 | 0.863      | 0.865   | 1.037  | 0.517     | 0.577  | 0.626   |
| Os09t0491868-00 | 0          | 0       | 0      | 0         | 0      | 0       |
| <b>UFGT</b>     |            |         |        |           |        |         |
| Os06t0192100-00 | 0.247      | 0.266   | 0      | 0.185     | 0.186  | 0       |
| Os07t0148200-01 | 3.251      | 2.362   | 5.685  | 3.981     | 6.014  | 6.883   |

**Table S11.** Primers for qRT-PCR.

| Gene ID         | Primer F (5'-3')          | Primer R (5'-3')          | Gene Name                                                  |
|-----------------|---------------------------|---------------------------|------------------------------------------------------------|
| Os10t0409400-01 | CGGTGCGTCACATCAGCAG       | TTTATTCCCTTGACCTTACCAATCA | RD22                                                       |
| Os06T0716700-01 | CACAATGACGACAAACAGCATG    | CAGGGGTTTCATTCCATGTATCC   | Heat shock protein (HSP90)                                 |
| Os05T0542500-02 | CGTCCTCCAAACAGGCGAGT      | CTCGTCTTCGGTCATCCCCA      | LEA-like protein                                           |
| Os11T0454300-01 | GCTCCAGCTCAAGCTCGTCTG     | CTGCTGCTCGCCCTTGTTG       | Water-stress inducible protein RAB16A                      |
| Os06t0727200-02 | GTCGGAGAGCGAGGCCCTA       | AGGGATACGCTCCCTGTCAAAC    | Catalase (CAT)                                             |
| Os10t0419400-01 | AGCCAGAGGTTACTCTTATGTGGAC | CGGTATGCAGGTGTTCTTCAAAGA  | Submergence-induced protein 2 (Sip2)                       |
| Os04t0549700-01 | GCAGACGCGAGCCATACACC      | GAGCTCTTGGGCCGGTCTTG      | Dehydration responsive element binding protein 1F (DREB1F) |
| Os01t0975300-01 | GATCAACGCTGGTTGTGGATC     | AGCTCTTCCCGCTGCGCT        | MYB48                                                      |
| Os12t0156100-01 | CGCGAGGATTGTCAGTGATCC     | GGAAGGATGGTAGCCGTAGACGT   | NAC134                                                     |
| Os12t0113500-01 | GGAATCTGGAGTCAAACAGAGTG   | GTCTGATCTGCTCCGAAAGCC     | CIPK14                                                     |

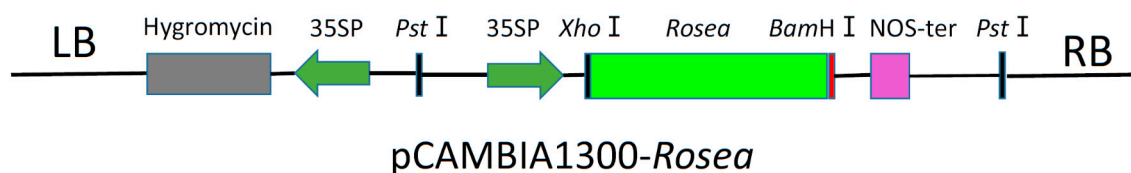**Figure S1.** The sketch of the binary vector pCambia1300-*AmRosea1*.

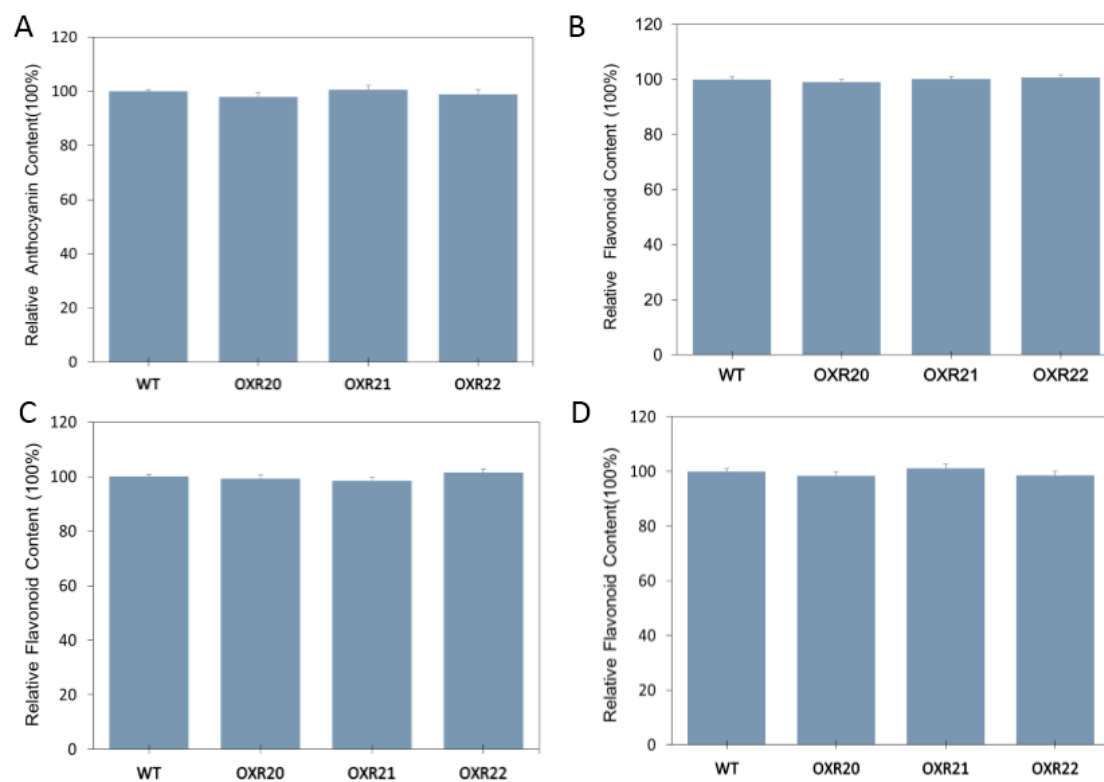

**Figure S2.** The relative contents of anthocyanin and flavonoids in leaves and seeds of WT and transgenic plants. (A) Anthocyanin of leaves; (B) anthocyanin of seeds; (C) flavonoids of leaves; (D) flavonoids of seeds.
